# Supplementary material for: Role of Sediments in Insecticide Runoff from Urban Surfaces: Analysis and Modeling
Source: PubMed Central journal article supplement (PMC6069241; doi:10.3390/ijerph15071464), 2018-07-11
Supplement: ijerph-15-01464-s001.pdf [file ijerph-15-01464-s001.pdf]

1 Supplementary Materials

2

## 3 **Role of Sediments in Insecticide Runoff from Urban** 4 **Surfaces: Analysis and Modeling**

5 **Angela Gorgoglione**<sup>1</sup>, **Fabián A. Bombardelli**<sup>1</sup>, **Bruno J.L. Pitton**<sup>2</sup>, **Lorence R. Oki**<sup>2</sup>, **Darren L. Haver**<sup>3</sup>,  
6 **and Thomas M. Young**<sup>1,\*</sup>

7 <sup>1</sup> Department of Civil and Environmental Engineering, University of California, Davis, One Shields Avenue, Davis,  
8 95616 California, USA; agorgoglione@ucdavis.edu, fabombardelli@ucdavis.edu, tyoung@ucdavis.edu

9 <sup>2</sup> Department of Plant Sciences, University of California, Davis, One Shields Avenue, Davis, 95616 California, USA;  
10 bjpitton@ucdavis.edu, lroki@ucdavis.edu

11 <sup>3</sup> Division of Agriculture and Natural Resources, South Coast Research & Extension Center, University of California,  
12 Irvine, 7601 Irvine Blvd., Irvine, 92618 California, USA; dlhaver@ucanr.edu

13 \* Correspondence: tyoung@ucdavis.edu; Tel.: +1 (530) 754-9399  
14

15

### 16 **Content:**

17 **SM-1:** Summary of the rainfall/runoff data for all events for F1 and F2.

18 **SM-2:** Summary of TSS and pyrethroid EML values for all events for F1 and F2.

19 **SM-3:** Linear correlation between TSS load washed off and insecticide load washed off.

20 **SM-4:** Calculation of the fraction of pyrethroids dissolved ( $f_{diss}$ ).

21 **SM-5:** Hydraulic/hydrologic model and sediment simulation.

22 **SM-6:** Comparison between measured and simulated mass washed off of (a) bifenthrin, (b)  
23 cyfluthrin, and (c) cypermethrin.

24

25

26

27

28 **SM-1:** Summary of the rainfall/runoff data for all events for F1 and F2.

| <b>Basin</b> | <b>Events</b> | <b>Total Rainfall (mm)</b> | <b>Event Duration (hr)</b> | <b>Antecedent Dry Period (day)</b> | <b>Runoff Volume (m<sup>3</sup>)</b> | <b>Runoff Peak (m<sup>3</sup>/s)</b> | <b>Total Depth (m)</b> |
|--------------|---------------|----------------------------|----------------------------|------------------------------------|--------------------------------------|--------------------------------------|------------------------|
| <b>F1</b>    | 10/17/2007    | 1.5                        | 0.90                       | -                                  | 1023.44                              | 0.08                                 | 86.29                  |
|              | 11/11/2007    | 41.3                       | 17.13                      | 24                                 | 3191.99                              | 0.30                                 | 131.01                 |
|              | 12/06/2007    | 79.7                       | 38.83                      | 24                                 | 11693.45                             | 1.18                                 | 224.74                 |
|              | 12/16/2007    | 49.2                       | 46.07                      | 9                                  | 6070.39                              | 0.18                                 | 203.73                 |
|              | 10/05/2008    | 13.3                       | 13.63                      | -                                  | 817.74                               | 0.24                                 | 70.49                  |
|              | 10/30/2008    | 49.6                       | 106.10                     | 23                                 | 9780.47                              | 0.52                                 | 416.15                 |
|              | 12/14/2008    | 6                          | 21.47                      | 39                                 | 1157.13                              | 0.11                                 | 85.81                  |
|              | 01/22/2009    | 35.9                       | 97.67                      | 35                                 | 9626.53                              | 0.32                                 | 387.53                 |
|              | 09/22/2014    | 13.2                       | 6.27                       | -                                  | 971.70                               | 0.25                                 | 170.20                 |
|              | 10/25/2014    | 2.7                        | 2.52                       | 30                                 | 393.81                               | 0.11                                 | 96.86                  |
|              | 10/31/2014    | 16.2                       | 28.27                      | 5                                  | 1904.97                              | 0.26                                 | 225.92                 |
| <b>F2</b>    | 10/10/2007    | 18.20                      | 4.87                       | -                                  | 1802.94                              | 0.31                                 | 63.03                  |
|              | 10/17/2007    | 1.50                       | 0.87                       | 5                                  | 9477.00                              | 0.04                                 | 39.91                  |
|              | 11/11/2007    | 41.30                      | 17.10                      | 24                                 | 3149.45                              | 0.23                                 | 116.38                 |
|              | 12/06/2007    | 79.40                      | 30.43                      | 24                                 | 132520.38                            | 5.40                                 | 532.29                 |
|              | 12/17/2007    | 49.50                      | 56.10                      | 9                                  | 3831.24                              | 0.13                                 | 170.73                 |
|              | 10/30/2008    | 84.90                      | 98.07                      | 23                                 | 30237.43                             | 1.58                                 | 484.17                 |
|              | 12/14/2008    | 18.60                      | 22.57                      | 39                                 | 1170.94                              | 0.14                                 | 98.22                  |
|              | 12/16/2008    | 6.30                       | 12.17                      | 1                                  | 498.84                               | 0.11                                 | 29.68                  |
|              | 21/12/2008    | 28.90                      | 20.87                      | 5                                  | 2710.86                              | 0.21                                 | 109.49                 |
|              | 05/10/2010    | 11.60                      | 2.07                       | -                                  | 1005.66                              | 0.59                                 | 19.84                  |
|              | 05/25/2010    | 9.30                       | 4.30                       | 14                                 | 830.79                               | 0.17                                 | 23.56                  |
|              | 10/26/2010    | 106.60                     | 32.80                      | -                                  | 662453.15                            | 7.52                                 | 2382.54                |
|              | 11/09/2010    | 24.80                      | 11.33                      | 10                                 | 20715.56                             | 0.64                                 | 250.33                 |
|              | 10/04/2011    | 14.80                      | 10.00                      | -                                  | 2366.42                              | 0.28                                 | 10.64                  |
|              | 10/10/2011    | 18.80                      | 15.20                      | 4                                  | 3740.74                              | 0.32                                 | 15.03                  |
|              | 10/21/2012    | 28.80                      | 12.50                      | -                                  | 2826.23                              | 0.27                                 | 11.09                  |
|              | 09/25/2014    | 15.30                      | 5.50                       | -                                  | 1058.15                              | 0.21                                 | 4.32                   |
|              | 10/25/2014    | 0.90                       | 0.58                       | 29                                 | 38.21                                | 0.08                                 | 5.74                   |
| 10/31/2014   | 21.80         | 13.50                      | 5                          | 1931.07                            | 0.21                                 | 9.60                                 |                        |
| 11/12/2014   | 6.70          | 11.50                      | 10                         | 379.57                             | 0.03                                 | 6.13                                 |                        |

30 **SM-2:** Summary of TSS and pyrethroid EML values for all events for F1 and F2.

| <b>Basin</b> | <b>Events</b> | <b>TSS<br/>EML<br/>(mg)</b> | <b>Bifenthrin<br/>EML<br/>(ng)</b> | <b>Cyfluthrin<br/>EML<br/>(ng)</b> | <b>Cypermethrin<br/>EML<br/>(ng)</b> |
|--------------|---------------|-----------------------------|------------------------------------|------------------------------------|--------------------------------------|
| <b>F1</b>    | 17/10/2007    | NA                          | 9.19E+06                           | NA                                 | NA                                   |
|              | 11/11/2007    | 6.384                       | 4.41E+07                           | 1.31E+07                           | 2.89E+07                             |
|              | 12/06/2007    | 81.854                      | 2.95E+08                           | 1.80E+08                           | 6.56E+07                             |
|              | 12/18/2007    | 30.352                      | 6.07E+07                           | 3.49E+07                           | 3.65E+07                             |
|              | 10/05/2008    | 102.626                     | 1.12E+08                           | 4.46E+07                           | 1.34E+07                             |
|              | 10/30/2008    | 342.317                     | 2.06E+08                           | 4.66E+07                           | 2.06E+08                             |
|              | 12/14/2008    | 15.043                      | 5.53E+07                           | 2.18E+07                           | 2.37E+07                             |
|              | 01/22/2009    | 548.712                     | 1.97E+08                           | 1.20E+08                           | 7.75E+07                             |
| <b>F2</b>    | 10/10/2007    | 93.753                      | 1.99E+08                           | 6.97E+07                           | 4.02E+07                             |
|              | 17/10/2007    | NA                          | 2.24E+08                           | 6.12E+07                           | 4.93E+07                             |
|              | 11/11/2007    | 29.92                       | 3.66E+08                           | 7.07E+07                           | 4.10E+07                             |
|              | 12/06/2007    | 6692.279                    | 9.25E+09                           | 1.93E+09                           | 1.85E+09                             |
|              | 12/17/2007    | 70.878                      | 1.45E+08                           | 3.29E+07                           | 1.69E+07                             |
|              | 10/30/2008    | 415.765                     | 1.00E+08                           | 5.75E+07                           | 3.35E+08                             |
|              | 12/14/2008    | 19.321                      | 7.26E+07                           | 4.59E+07                           | 1.33E+07                             |
|              | 10/26/2010    | 5299.625                    | 3.29E+09                           | 3.44E+08                           | 2.98E+08                             |
|              | 11/09/2010    | 82.862                      | 9.90E+07                           | NA                                 | 1.47E+07                             |

31

32

33

34

35

36

37

38

39

40

41

42

43 SM-3: Linear correlation between TSS load washed off and insecticide load washed off.

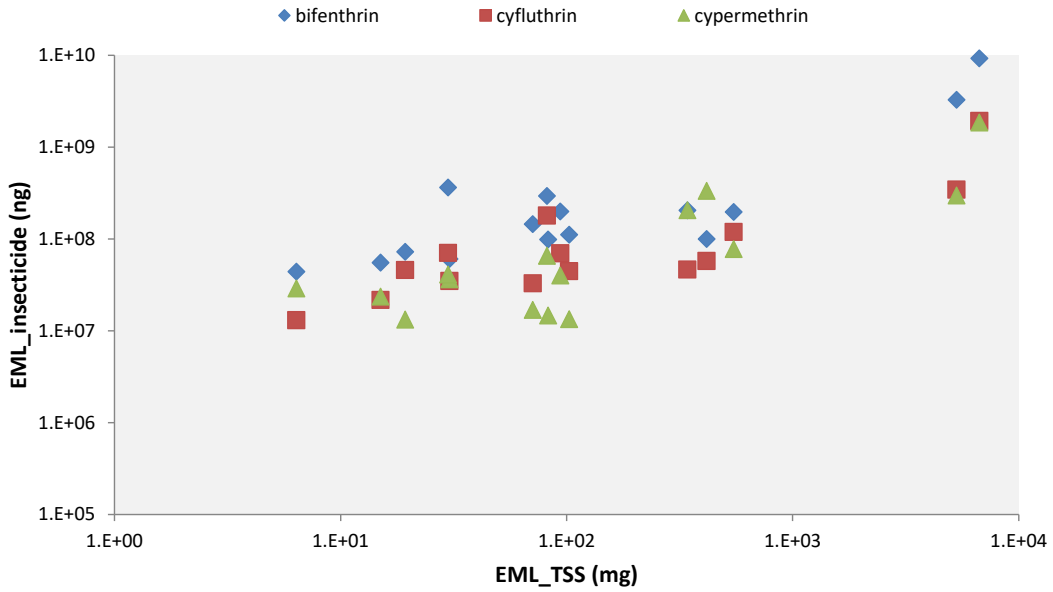

44

45 Bifenthrin:  $y = 1.0E^{+06}x - 4.0E^{+07}$  with  $R^2 = 0.87$

46 Cyfluthrin:  $y = 1.9E^{+05}x + 2.0E^{+07}$  with  $R^2 = 0.73$

47 Cypermethrin:  $y = 1.8E^{+05}x + 3.1E^{+07}$  with  $R^2 = 0.70$

48 where  $x$  and  $y$  represent EML\_TSS (mg) and EML of each insecticide (ng) respectively.

49 **SM-4:** Calculation of the fraction of pyrethroids dissolved ( $f_{diss}$ ).

50 By considering TSS concentration ( $C_{TSS}$ ), the concentration of pesticide dissolved ( $C_{diss\_pest}$ ), and the  
51 concentration of pesticide adsorbed to solid particles ( $C_{ads\_pest}$ ), the distribution coefficient between  
52 water and sediments of pesticides ( $K_d$ ) is given by:

$$53 \quad K_d = \frac{C_{ads\_pest}}{C_{diss\_pest}} \left[ \frac{\mu g_{pest}/g_{TSS}}{\mu g_{pest}/L_w} \right] \quad (I)$$

54 Considering (I), it is possible to calculate the fraction of pyrethroids dissolved ( $f_{diss}$ ):

$$55 \quad f_{diss} = \frac{C_{diss\_pest} \cdot V_w}{C_{diss\_pest} V_w + C_{ads\_pest} C_{TSS}} = \frac{C_{diss\_pest}}{C_{diss\_pest} + K_d C_{diss\_pest} C_{TSS}} = \frac{1}{1 + K_d C_{TSS}} \quad (II)$$

56

57 knowing that:  $K_d = f_{OC} \cdot K_{OC}$

58 By assuming the sediment organic carbon content ( $f_{oc}$ ) equal to  $f_{oc}=0.05$  for bifenthrin, cyfluthrin,  
59 and cypermethrin, and knowing that the organic carbon-normalized coefficient ( $K_{OC}$ ) of the three  
60 pyrethroids is  $K_{OC\_bif}=1.31 \cdot 10^5 \div 3.02 \cdot 10^5$ ,  $K_{OC\_cyfl}=6.24 \cdot 10^4$ ;  $K_{OC\_cyperm}=6.10 \cdot 10^4$ , it was possible to evaluate  
61  $K_d$ .

62

63 **SM-5: Hydrologic model and sediment simulation.**

64 The hydrologic and water-quality (sediment) models were implemented in the Storm Water  
65 Management Model (SWMM). Appropriate model parameter values were identified to generate  
66 separate models capable of predicting the hydrologic and water-quality responses of F1 and F2 to a  
67 diverse set of inputs.

68 Hydrologic simulations

69 To simulate the runoff from urban surfaces, the dynamic-wave equation was chosen. Furthermore,  
70 the water losses taken into account are represented by the depression storage on the impervious  
71 portion of the basin and the infiltration process. The latter was modeled by evaluating, for each  
72 subcatchment, the percentage of impervious and pervious area obtained from the land-use map. The  
73 infiltration model utilized in this work was based on Horton's equation, whose parameter values  
74 have been chosen according to the representative values reported in the literature, in relation to soil  
75 type.

76 Eight parameters of the runoff block of SWMM were used to calibrate the hydraulic-hydrologic  
77 model: the depth of depression storage on impervious (*Dstore-Imperv*) and pervious (*Dstore-Perv*)  
78 portions of the subcatchment, Manning's coefficient for overland flow over the impervious (*N-*  
79 *Imperv*) and pervious (*N-Perv*) portions of the subcatchment, the percent of impervious area without  
80 depression storage (*%Zero Imperv*), and the infiltration parameters of Horton's equation. Working  
81 within the established range, and comparing numerically and statistically the simulation with the  
82 measured hydrograph, the calibration was performed until a good fit was obtained. For brevity, in  
83 Table I only the most recent rainfall events are shown, and, among these, only the event 10/31/2014  
84 related to F1 is reported in Fig. I.

85 **Table I.** Numerical comparison between the simulated and measured hydrographs for each rainfall event.

| Basin | Events     | R <sup>2</sup> | RMSE   | NSE     |
|-------|------------|----------------|--------|---------|
| F1    | 09/25/2014 | 0.861          | 17.941 | 0.721   |
|       | 10/31/2014 | 0.872          | 13.274 | 0.747   |
| F2    | 09/25/2014 | 0.942          | 52.392 | -0.123  |
|       | 10/31/2014 | 0.850          | 43.428 | -0.812  |
|       | 11/13/2014 | 0.933          | 12.806 | -16.552 |

86

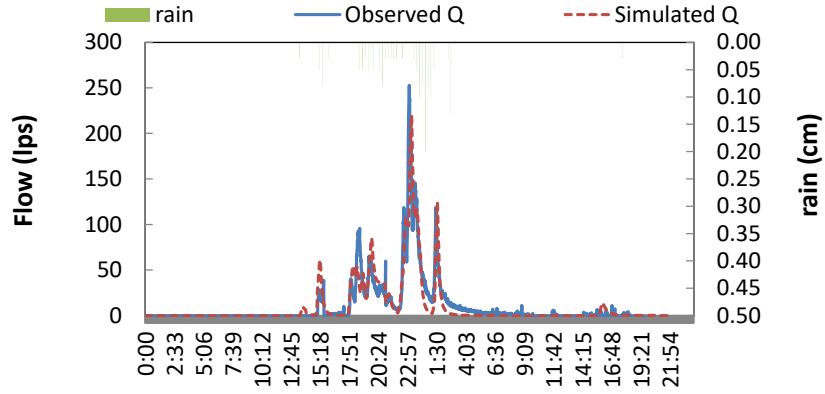

87

88 **Fig. I.** Comparison between observed (blue line) and simulated hydrograph (red dotted line) for the event 31  
 89 Oct 2014 at F1.

90 Sediment simulations

91 TSS build-up within a land-use category is described by a mass per unit of subcatchment area. The  
 92 amount of build-up is a function of the number of dry weather days antecedent to the rainfall event.  
 93 The build-up function follows a growth law that asymptotically approaches a maximum limit:

94 
$$M_a(d_{adp}) = \left(\frac{Accu}{Disp}\right) A P_{imp} \left(1 - e^{-(Disp d_{adp})}\right) \quad (III)$$

95 where  $M_a(d_{adp})$  represents the pollutant build-up during the antecedent dry period [kg/ha];  $Disp$  is  
 96 the parameter that measures the disappearance of accumulated solids due to the action of wind or  
 97 vehicular traffic [1/d];  $P_{imp}$  is the impervious area fraction;  $Accu$  is the parameter that characterizes  
 98 the solids build-up rate [kg/(ha d)];  $\left(\frac{Accu}{Disp}\right) A P_{imp}$  represents the maximum asymptotic limit of the  
 99 build-up curve.

100 The pollutant wash-off over different land uses takes place during wet periods, and it is described  
 101 by the differential equation:

102 
$$\frac{dM_a(t)}{dt} = -Arra i(t)^{wash} M_a(t) \quad (IV)$$

103 where  $\frac{dM_a(t)}{dt}$  is the wash-off load rate [kg/h];  $Arra$  is the wash-off coefficient [mm<sup>-1</sup>];  $i(t)$  is the runoff  
 104 rate [mm/h];  $wash$  is the wash-off exponent, a parameter that controls the influence of rainfall  
 105 intensity on the amount of leached pollutants.

106 SWMM calculates the spatial and temporal trend of pollutant concentrations in the drainage  
 107 network, assuming that the conduits behave as ideal, completely-mixed flow reactors (CMFRs). The  
 108 control volume (the reactor volume) coincides with the conduit volume. Inside the reactor, the  
 109 mathematical balance is obtained from a macroscopic material mass balance:

110 
$$\frac{d(VC)}{dt} = Q_{in}C_{in} - Q_{out}C_{out} - kVC_{out} \quad (V)$$

111 in which V represents the water volume in the conduit (reactor), calculated at each time step [m<sup>3</sup>];  
 112 Q<sub>in</sub> is the inflow in the conduit [m<sup>3</sup>/s]; C<sub>in</sub> is the sediment concentration at the inlet of the conduit  
 113 [mg/L]; Q<sub>out</sub> is the outflow to the conduit [m<sup>3</sup>/s]; C<sub>out</sub> is the sediment concentration in volume V  
 114 at the outlet of the conduit [mg/L]; and k is the decay coefficient [s<sup>-1</sup>].

115 Four parameters of the runoff block were identified for the calibration of the water-quality model.  
 116 For the build-up function: the parameter that characterizes the solids build-up rate (*Accu*) and the  
 117 parameter that identifies the disappearance of accumulated sediments due to the action of the wind  
 118 or vehicular traffic (*Disp*). For the wash-off function: the wash-off coefficient (*Arra*) and the wash-off  
 119 exponent (*wash*). As we did for the hydraulic-hydrologic model, calibration was performed via an  
 120 iterative process by adjusting the water-quality parameters. The results of the calibration process are  
 121 shown in Fig. II, which compares the correlation between sediment load observations and  
 122 simulations.

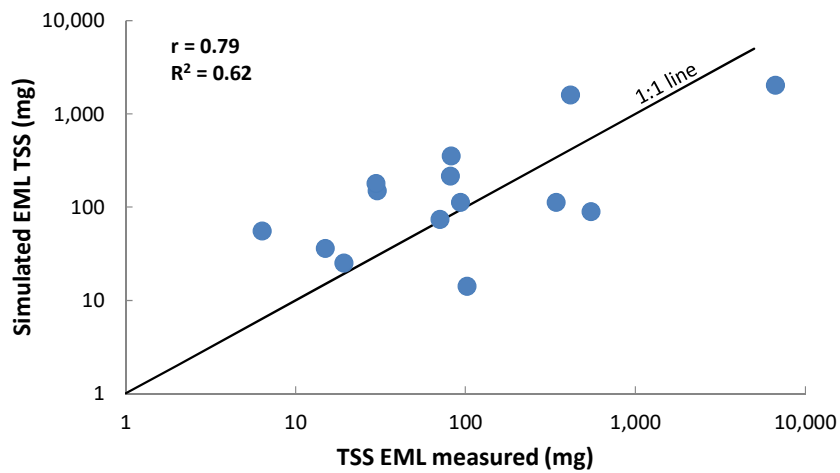

123

124

**Fig. II.** Linear correlation among observed and simulated EML for F1 and F2.



125 SM-6: Comparison between measured and simulated mass washed off of (a) bifenthrin,  
 126 (b) cyfluthrin, and (c) cypermethrin.

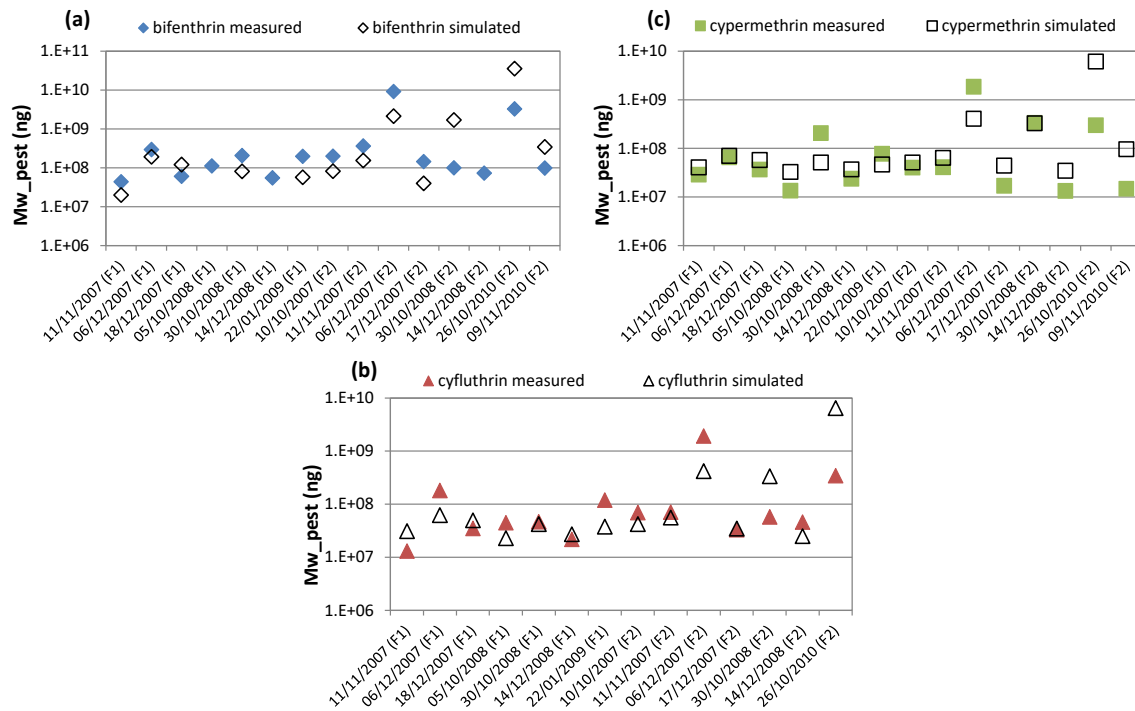

127
